# Supplementary material
Source: publisher figshare collection journal article supplement (https://sage.figshare.com/ndownloader/files/12388775)
Supplement: Supplementary file 1 [file 12388775]

Table S1

## Study 1: Descriptive Statistics

| Variable                  | Scale                      | <i>M</i> | <i>SD</i> | <i>Min</i> | <i>Max</i> | $\alpha^a$ |
|---------------------------|----------------------------|----------|-----------|------------|------------|------------|
| <b>Cognitive Failures</b> |                            |          |           |            |            |            |
| CFQ                       | 0–4, mean across 32 items  | 1.36     | 0.46      | 0.16       | 2.81       | .91        |
| Clumsiness                | 0–4, mean across 4 items   | 1.11     | 0.58      | 0.00       | 3.00       | .74        |
| Retrieval                 | 0–4, mean across 5 items   | 1.51     | 0.61      | 0.00       | 3.20       | .74        |
| Intention forgotten       | 0–4, mean across 3 items   | 0.49     | 0.54      | 0.00       | 2.67       | .62        |
| <b>Processing Speed</b>   |                            |          |           |            |            | .94        |
| Digit symbol              | 0–100, # of correct trials | 52.41    | 11.93     | 19.00      | 90.00      | --         |
| Digit letter              | 0–100, # of correct trials | 58.27    | 13.88     | 19.00      | 89.00      | --         |
| <b>Memory</b>             |                            |          |           |            |            | .76        |
| Digit span forward        | 0–16, # of correct trials  | 10.10    | 2.00      | 6.00       | 15.00      | --         |
| Digit span backward       | 0–14, # of correct trials  | 7.03     | 2.05      | 4.00       | 13.00      | --         |
| Corsi block forward       | 0–16, # of correct trials  | 8.36     | 1.72      | 4.00       | 13.00      | --         |
| Corsi block backward      | 0–14, # of correct trials  | 8.64     | 2.16      | 2.00       | 14.00      | --         |
| <b>Inhibition</b>         |                            |          |           |            |            | .68        |
| Flanker                   | Difference mean RT         | 61.05    | 55.49     | 1.99       | 448.97     | --         |
| Simon                     | Difference mean RT         | 43.73    | 29.25     | 0.87       | 250.60     | --         |
| <b>Big Five</b>           |                            |          |           |            |            |            |
| Neuroticism               | 1–7, mean across 3 items   | 4.19     | 1.44      | 1.00       | 7.00       | .80        |
| Extraversion              | 1–7, mean across 3 items   | 4.64     | 1.16      | 1.00       | 7.00       | .67        |
| Openness                  | 1–7, mean across 3 items   | 4.82     | 1.13      | 1.00       | 7.00       | .62        |
| Agreeableness             | 1–7, mean across 3 items   | 5.27     | 1.02      | 1.00       | 7.00       | .55        |
| Conscientiousness         | 1–7, mean across 3 items   | 5.36     | 1.08      | 1.00       | 7.00       | .58        |
| <b>Control Variables</b>  |                            |          |           |            |            |            |
| Age                       | Years                      | 51.70    | 15.50     | 20.00      | 86.00      | --         |
| Life satisfaction         | 1–7, mean across 5 items   | 5.00     | 1.29      | 1.00       | 7.00       | .90        |

*Notes.* <sup>a</sup>Internal consistencies: Cronbach's  $\alpha$  was calculated for scales with self-reported items (personality, cognitive failures, and life satisfaction). The internal consistencies of objective cognitive performance (processing speed, memory, and inhibition) were estimated by relating the proportion of latent variation to total variation for each latent factor (see Figure 1). CFQ = Cognitive Failures Questionnaire; # = number; RT = reaction time in milliseconds. The Big Five were assessed with a German short version of the Big Five Inventory (BFI-S; Gerlitz & Schupp, 2005).

Table S2

Study 1: Correlations between Personality, Cognitive Performance, and Cognitive Failures.

|                              | Personality |       |        |       |       | Cognitive Performance |        |      | Cognitive Failures |       |       |
|------------------------------|-------------|-------|--------|-------|-------|-----------------------|--------|------|--------------------|-------|-------|
|                              | 1           | 2     | 3      | 4     | 5     | 6                     | 7      | 8    | 9                  | 10    | 11    |
| <b>Personality</b>           |             |       |        |       |       |                       |        |      |                    |       |       |
| 1. Openness                  | –           |       |        |       |       |                       |        |      |                    |       |       |
| 2. Conscientiousness         | .12         | –     |        |       |       |                       |        |      |                    |       |       |
| 3. Extraversion              | .17         | .26** | –      |       |       |                       |        |      |                    |       |       |
| 4. Agreeableness             | .13         | .29** | .24**  | –     |       |                       |        |      |                    |       |       |
| 5. Neuroticism               | –.08        | –.15  | –.27** | –.18* | –     |                       |        |      |                    |       |       |
| <b>Cognitive Performance</b> |             |       |        |       |       |                       |        |      |                    |       |       |
| 6. Processing Speed          | –.05        | .17*  | .18*   | –.01  | –.07  | –                     |        |      |                    |       |       |
| 7. Memory                    | –.17*       | .08   | .16    | –.01  | –.03  | .68**                 | –      |      |                    |       |       |
| 8. Inhibition                | .25**       | –.04  | .18*   | .16   | .07   | –.30                  | –.36** | –    |                    |       |       |
| <b>Cognitive Failures</b>    |             |       |        |       |       |                       |        |      |                    |       |       |
| 9. CFQ (Overall Score)       | .02         | –.31* | –.19*  | –.06  | .45** | –.05                  | .01    | .12  | –                  |       |       |
| 10. Clumsiness               | .14         | –.19  | –.16   | .01   | .17** | .04                   | .04    | –.04 | – <sup>a</sup>     | –     |       |
| 11. Retrieval                | .01         | –.28* | –.11   | .01   | .32** | .04                   | .01    | .17  | – <sup>a</sup>     | .58** | –     |
| 12. Intention Forgotten      | .02         | –.20  | –.09   | .06   | .42** | –.10                  | .02    | .12  | – <sup>a</sup>     | .46** | .79** |

*Notes.* \*\* $p < .005$ ; \* $p < .05$ . <sup>a</sup> Not estimated (in the same factor model in Study 1, but see Table S4 of Study 2). The correlations were derived from the model depicted in Figure 1 – except for those in the last three lines, which were derived from the model depicted in Figure 2.

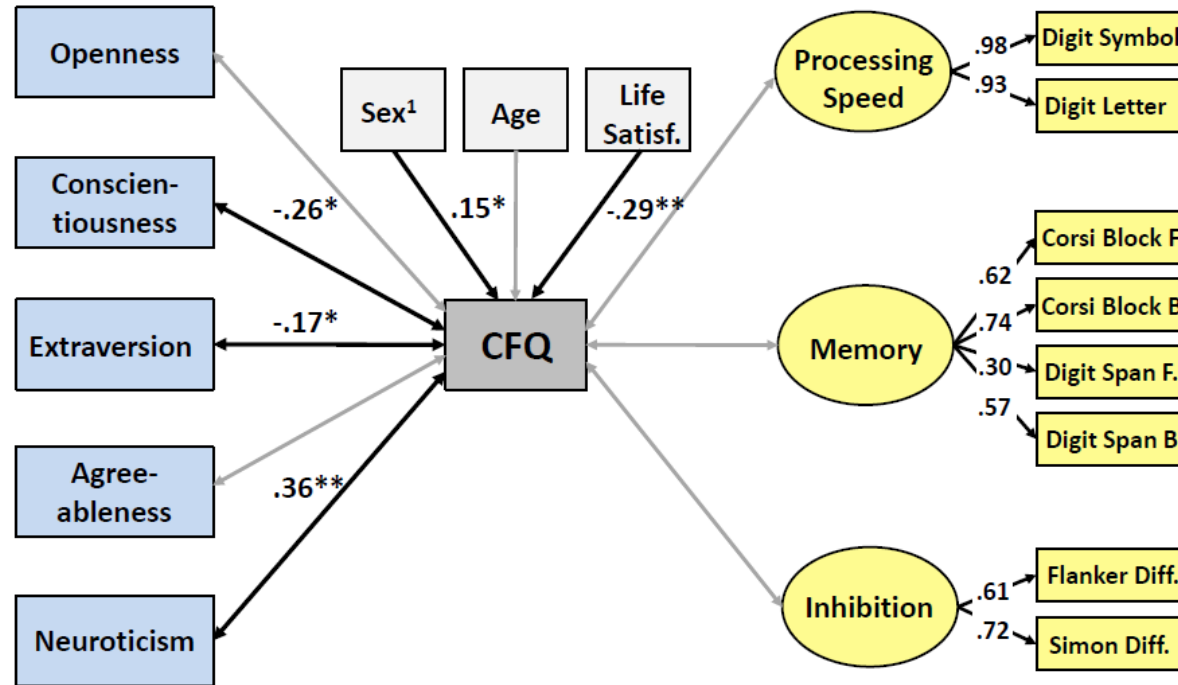

Figure S1. The relations of cognitive failures, personality, and cognitive performance after controlling for sex, age, and satisfaction of life (Study 1). \*\* $p < .005$ ; \* $p < .05$ . The fit of the model to the data was good [ $X^2(df = 71) = 94.61$ ,  $p = .03$ ; CFI = .97; RMSEA = .05 (90 % CI = .01–.07); and SRMR = .05]. Please note that some arrows are double arrows (i.e., correlations). All correlations between the Big Five and cognitive performance were estimated but are not displayed. All parameters are standardized. The squares represent observed variables and the circles represent latent variables.

<sup>1</sup>Sex was coded as 0 = male, 1 = female.

CFQ = Cognitive Failures Questionnaire; F. = Forwards; B. = Backwards; Diff. = Difference.

Table S3

## Study 2: Descriptive Statistics

| Variable                            | <i>M</i> | <i>SD</i> | <i>Min</i> | <i>Max</i> | <i>α</i> |
|-------------------------------------|----------|-----------|------------|------------|----------|
| <b>CFQ (overall mean)</b>           | 1.42     | 0.47      | 0.34       | 2.78       | .88      |
| <b>Big Five</b>                     |          |           |            |            |          |
| Neuroticism                         | 2.88     | 0.49      | 1.51       | 3.96       | .92      |
| Extraversion                        | 3.41     | 0.39      | 2.27       | 4.35       | .89      |
| Openness                            | 3.40     | 0.45      | 0.16       | 4.58       | .86      |
| Agreeableness                       | 3.43     | 0.38      | 2.04       | 4.15       | .84      |
| Conscientiousness                   | 3.54     | 0.41      | 2.38       | 4.67       | .83      |
| <b>Sub-Scales Neuroticism</b>       |          |           |            |            |          |
| Anxiety                             | 3.10     | 0.74      | 1.13       | 4.75       | .79      |
| Hostility                           | 2.65     | 0.57      | 1.13       | 4.00       | .66      |
| Depression                          | 2.73     | 0.74      | 1.13       | 4.50       | .87      |
| Self-consciousness                  | 3.08     | 0.60      | 1.63       | 4.50       | .76      |
| Impulsiveness                       | 3.11     | 0.49      | 1.86       | 4.38       | .47      |
| Vulnerability to Stress             | 2.60     | 0.62      | 1.00       | 4.75       | .81      |
| <b>Sub-Scales Conscientiousness</b> |          |           |            |            |          |
| Competence                          | 3.72     | 0.43      | 2.50       | 4.88       | .69      |
| Order                               | 3.49     | 0.58      | 2.13       | 4.75       | .65      |
| Dutifulness                         | 3.86     | 0.52      | 2.38       | 5.00       | .56      |
| Achievement Striving                | 3.53     | 0.53      | 2.13       | 4.75       | .51      |
| Self-Discipline                     | 3.32     | 0.67      | 1.63       | 5.00       | .70      |
| Deliberation                        | 3.20     | 0.41      | 2.14       | 4.17       | .67      |

*Notes.* CFQ = Cognitive Failures Questionnaire.  $\alpha$  = Cronbach's alpha. The CFQ scale was ranged 0–4 and the personality scales were ranged 1–7. The Big Five were assessed with a German version of the Revised NEO Personality Inventory (NEO-PI-R; Costa & McCrae, 1992).

Table S4

Study 2: Correlations between Personality Domains and Cognitive Failures.

|                           | Personality |        |        |        |       | Cognitive Failures |       |       |
|---------------------------|-------------|--------|--------|--------|-------|--------------------|-------|-------|
|                           | 1           | 2      | 3      | 4      | 5     | 6                  | 7     | 8     |
| <b>Personality</b>        |             |        |        |        |       |                    |       |       |
| 1. Openness               | –           |        |        |        |       |                    |       |       |
| 2. Conscientiousness      | –.02        | –      |        |        |       |                    |       |       |
| 3. Extraversion           | .21*        | .08    | –      |        |       |                    |       |       |
| 4. Agreeableness          | .04         | .31**  | .02    | –      |       |                    |       |       |
| 5. Neuroticism            | –.09        | –.38** | –.41** | –.11   | –     |                    |       |       |
| <b>Cognitive Failures</b> |             |        |        |        |       |                    |       |       |
| 6. CFQ (Overall Score)    | –.07        | –.43** | –.21** | –.23** | .60** | –                  |       |       |
| 7. Clumsiness             | .01         | –.26** | –.02   | –.07   | .31** | .59**              | –     |       |
| 8. Retrieval              | –.08        | –.46** | –.25** | –.17*  | .52** | .86**              | .42** | –     |
| 9. Intention Forgotten    | –.12        | –.09   | –.17*  | –.22** | .33** | .62**              | .31** | .46** |

Notes. \*\* $p < .005$ ; \* $p < .05$ .

Table S5

Study 1: Predictors of Cognitive Failures (Full CFQ Scale and Different Types of Failures)

| Predictor                            | CFQ<br>Model 1 <sup>a</sup> | CFQ<br>Model 2 <sup>b</sup> | Clumsiness | Retrieval     | Intention<br>Forgotten |
|--------------------------------------|-----------------------------|-----------------------------|------------|---------------|------------------------|
|                                      | $\beta$                     | $\beta$                     | $\beta$    | $\beta$       | $\beta$                |
| <b>Personality</b>                   |                             |                             |            |               |                        |
| Openness                             | .08                         | .07                         | .14        | .03           | .03                    |
| Conscientiousness                    | <b>-.26**</b>               | <b>-.24**</b>               | -.18*      | <b>-.26**</b> | -.14                   |
| Extraversion                         | -.07                        | -.07                        | -.11       | -.02          | .09                    |
| Agreeableness                        | .09                         | .08                         | .13        | .11           | .12                    |
| Neuroticism                          | <b>.42**</b>                | <b>.36**</b>                | .15        | <b>.27**</b>  | <b>.37**</b>           |
| <b>Cogn. Performance<sup>c</sup></b> |                             |                             |            |               |                        |
| Processing Speed                     | .01                         | .01                         | .06        | .06           | -.06                   |
| Memory                               | .07                         | .12                         | .02        | .05           | .03                    |
| Inhibition                           | .06                         | .07                         | .07        | .10           | .03                    |
| <b>Control Variables</b>             |                             |                             |            |               |                        |
| Sex (0 = male, 1 = female)           |                             | .15                         |            |               |                        |
| Age                                  |                             | .09                         |            |               |                        |
| Life Satisfaction                    |                             | -.15*                       |            |               |                        |
| <b><math>R^2</math></b>              | .28                         | .32                         | .10        | .16           | .16                    |
| <b><math>F(df)</math></b>            | 7.26** (8)                  | 6.18**(11)                  | 2.02*(8)   | 3.49**(8)     | 3.44**(8)              |

Notes. <sup>a</sup>Model 1 = without control variables; <sup>b</sup>Model 2 = with control variables; <sup>c</sup>All three predictors were computed as the mean of the z-scores of the respective tasks. CFQ = Cognitive Failures Questionnaire (full scale). All models are linear regression models. \*\* $p < .005$ ; \* $p < .05$ .
